# Supplementary material for: PPARγ deficiency results in severe, accelerated osteoarthritis associated with aberrant mTOR signalling in the articular cartilage
Source: HighWire-hosted journal article supplement (doi:10.1136/annrheumdis-2014-205743), 2015-01-09

**Supplementary Figure 1:** Histological analysis using Safranin O/fast green staining of 6 months old PPAR $\gamma$  KO mice and control mice showed no signs of cartilage degeneration (n=4; Magnification:  $\times 40$ ).

Supplementary Figure 1

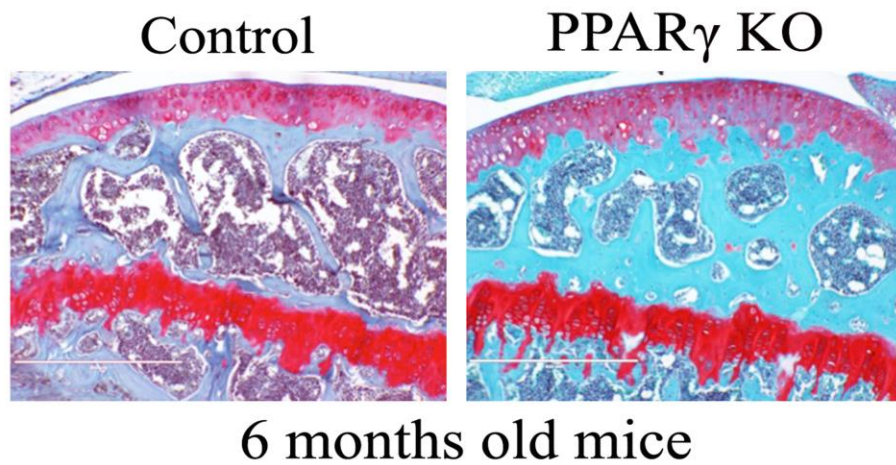

Supplement: annrheumdis-2014-205743supp.pdf [file annrheumdis-2014-205743supp.pdf]
